# Supplementary material for: Microbial Production of Melanin Pigments from Caffeic Acid and L-Tyrosine Using Streptomyces glaucescens and FCS-ECH-Expressing Escherichia coli
Source: PubMed Central journal article supplement (PMC7957706; doi:10.3390/ijms22052413), 2021-02-27
Supplement: ijms-22-02413-s001.pdf [file ijms-22-02413-s001.pdf]

- 1 **Figure S1.** <sup>1</sup>H-NMR of (A) melanin standard as a control, (B) MeIC, FCS/ECH+tyrosine, (C) TAL/MeIC,
- 2 FCS/ECH
- 3 (A)

### Melanin standard

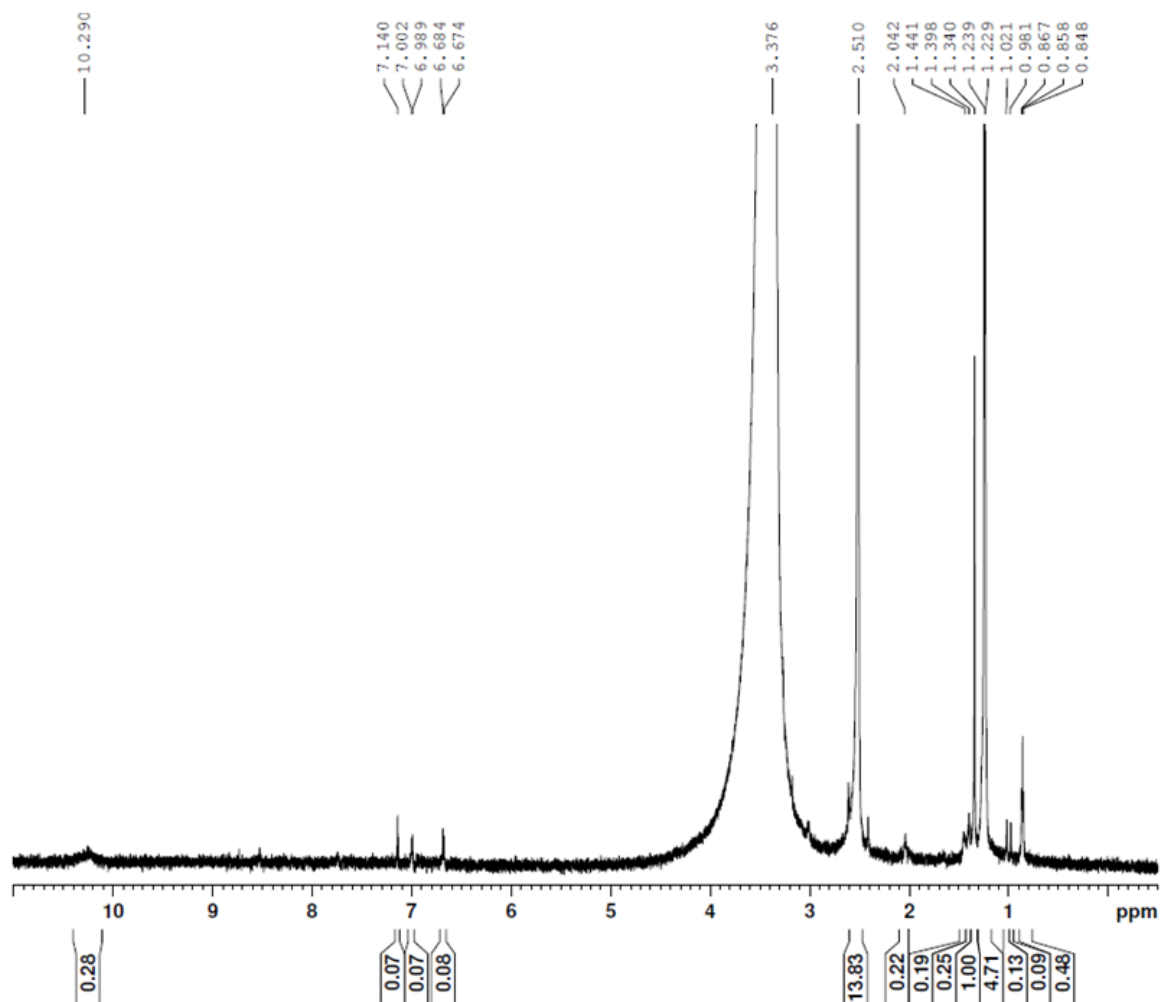

- 4
- 5

6 (B)

### MeIC, FCS/ECH

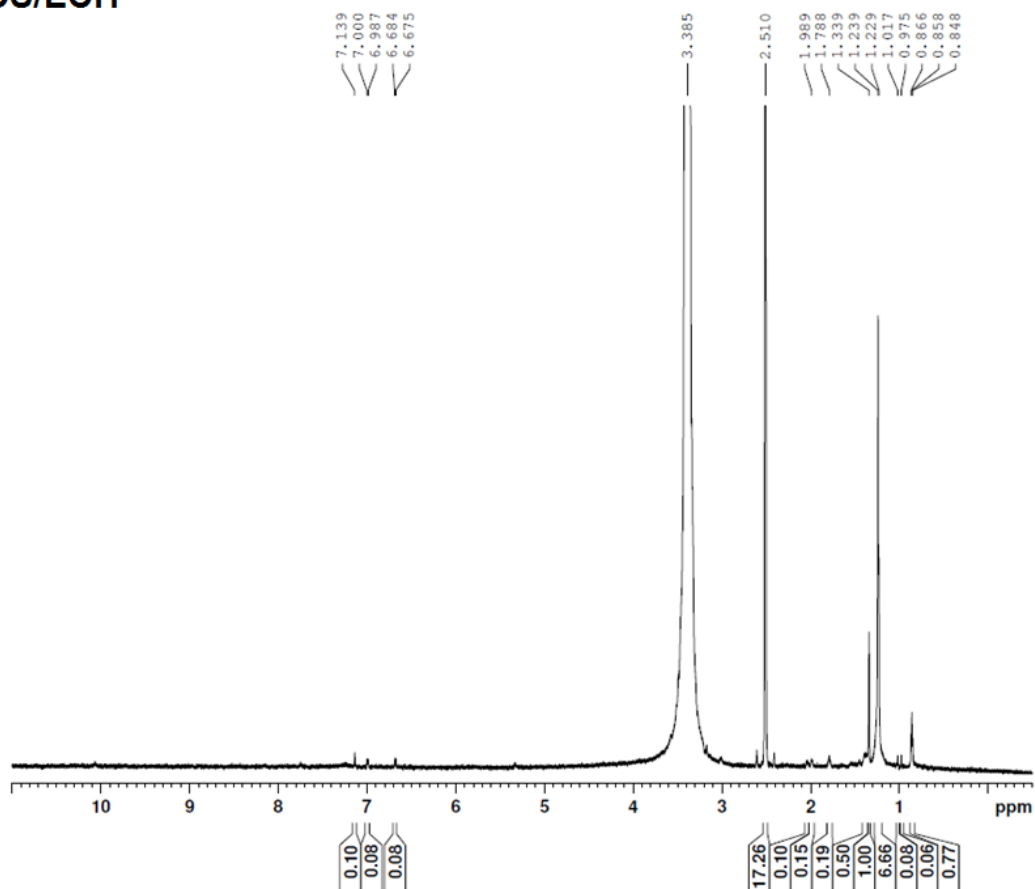

7

8

9 (C)

### TAL/MeIC, FCS/ECH

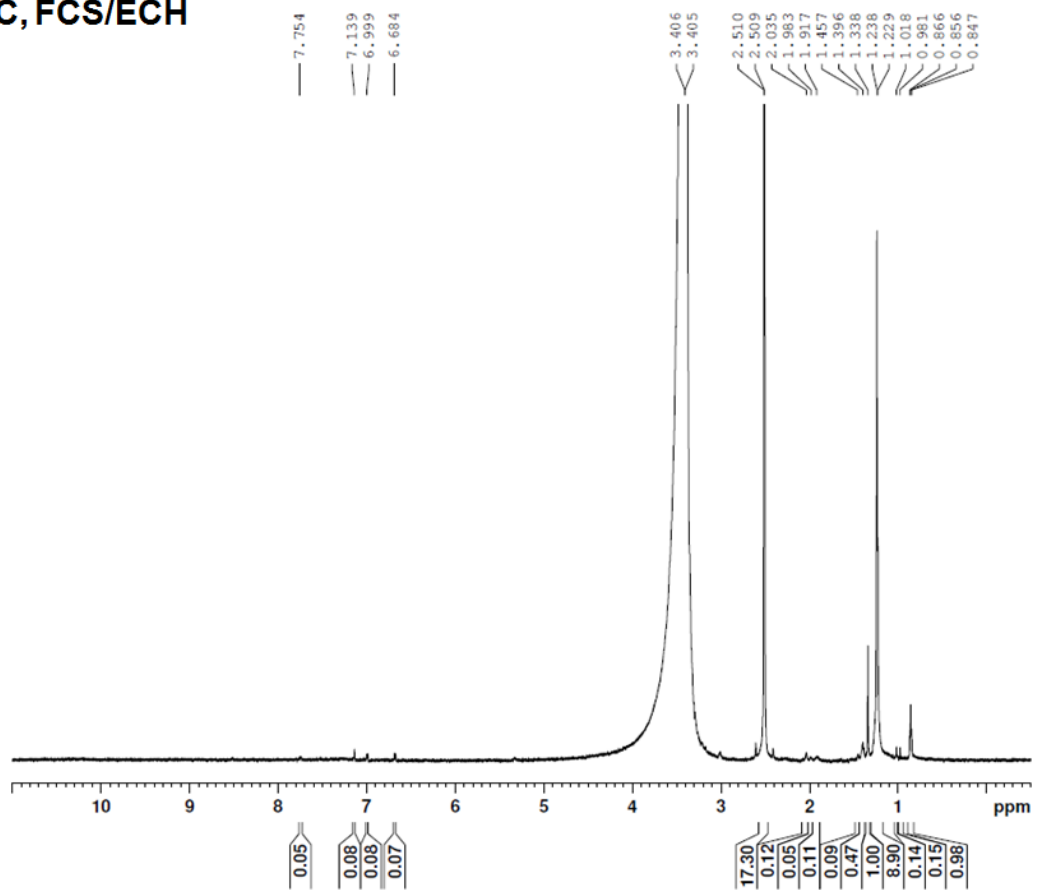

10

11
